# Supplementary material
Source: PubMed Central journal article supplement (PMC4657548)
Supplement: NIHMS715843-supplement-Supporting_Information.pdf [file NIHMS715843-supplement-Supporting_Information.pdf]

## Supporting Information

## Table of Contents

|      |                                                                           |     |
|------|---------------------------------------------------------------------------|-----|
| I.   | CEST Spectroscopy.....                                                    | S2  |
| II.  | Measurement of the Bound Water Lifetime ( $\tau_B$ ) by $T_{2exch}$ ..... | S4  |
| III. | Imaging Protocols.....                                                    | S8  |
| IV.  | Imaging Processing.....                                                   | S8  |
| V.   | Experimental.....                                                         | S9  |
|      | General Remarks.....                                                      | S9  |
|      | Synthesis of Ligand 2.....                                                | S9  |
|      | Synthesis of the Metal Complex.....                                       | S11 |
| VI.  | References.....                                                           | S12 |

## I. CEST Spectroscopy

CEST spectra of 20 mM solutions of Tb•2 in 50% water in CD<sub>3</sub>CN were recorded on a Varian INOVA 400 spectrometer. NMR samples containing different pH values ranging from 5.0 to 8.0 were trapped in 5 mm sample tubes and scanned at 298 and 310 K, respectively. CEST spectra were generated by plotting the residual bulk water signal intensity ratio as a function of saturation frequency. A pre-saturation pulse of 3 s duration was applied at 498 Hz. The pH values of the samples were measured using a Corning 125 pH meter with a calibrated combined microelectrode purchased from Aldrich Chemical Co.

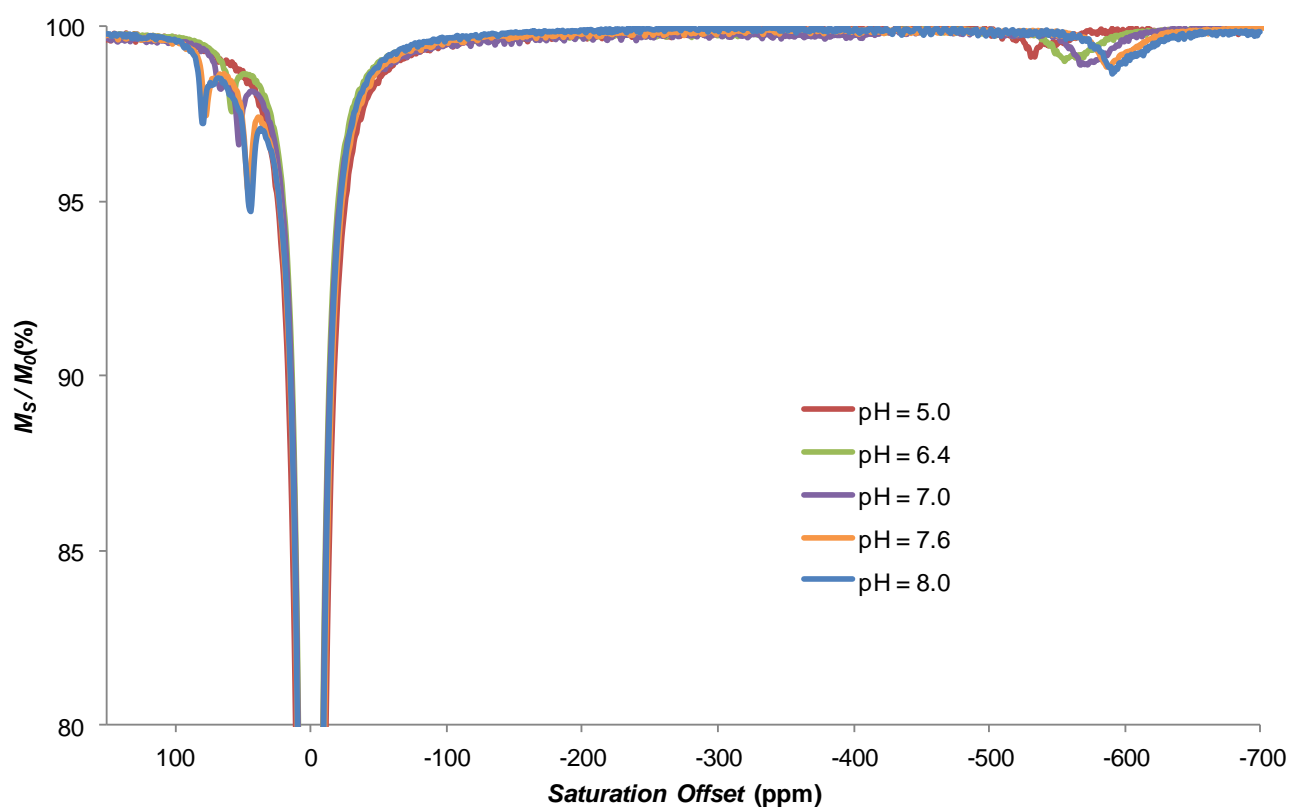

**Figure S1a.** CEST spectra of 20mM Tb•2 agent recorded at 298 K with B<sub>1</sub> of 11.7 μT.

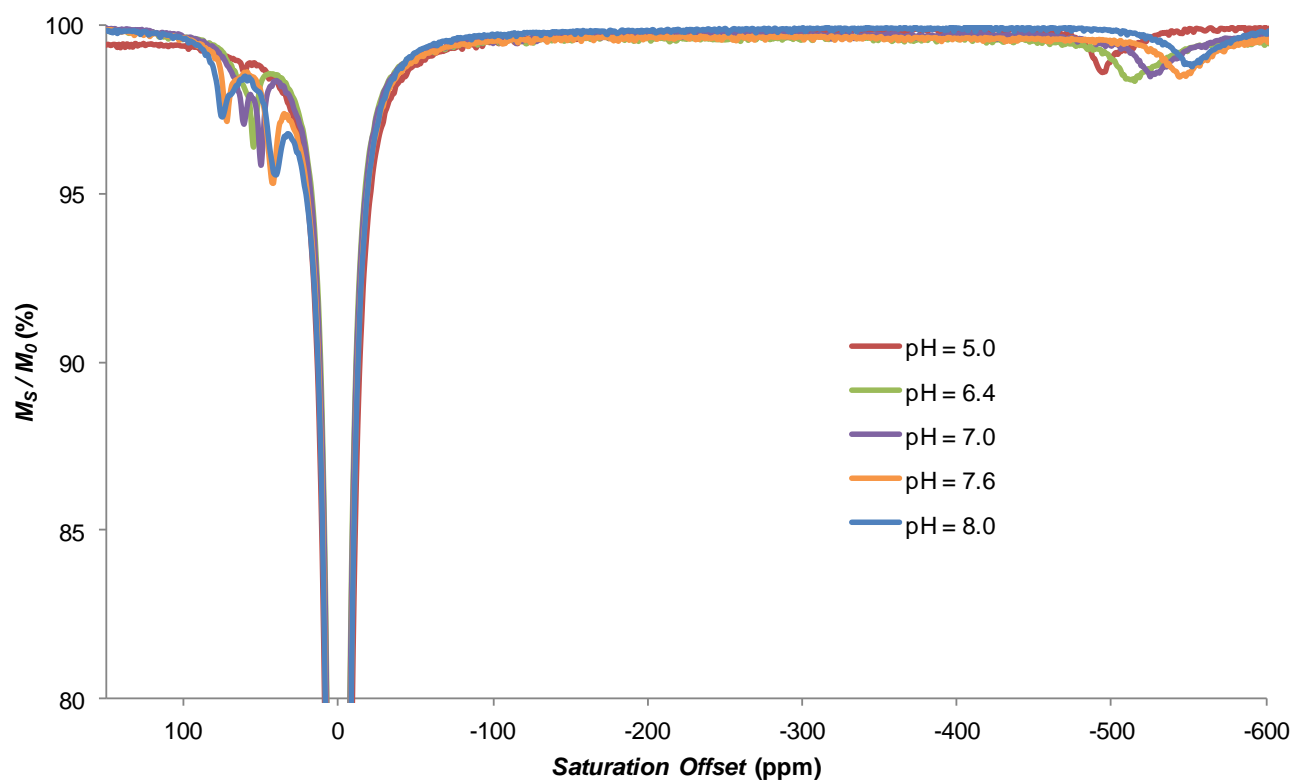

**Figure S1b.** CEST spectra of 20mM Tb•2 agent recorded at 310 K with B<sub>1</sub> of 11.7 μT.

Two samples containing 20mM Tb•2 agents at pH 7 were prepared. One contained just the solution, whereas the other contained the solution mixed with minced mouse kidney tissue to generate MT effects similar to those observed in biological tissue. Asymmetry analysis is performed with respect to the free water frequency assigned to 0 ppm.

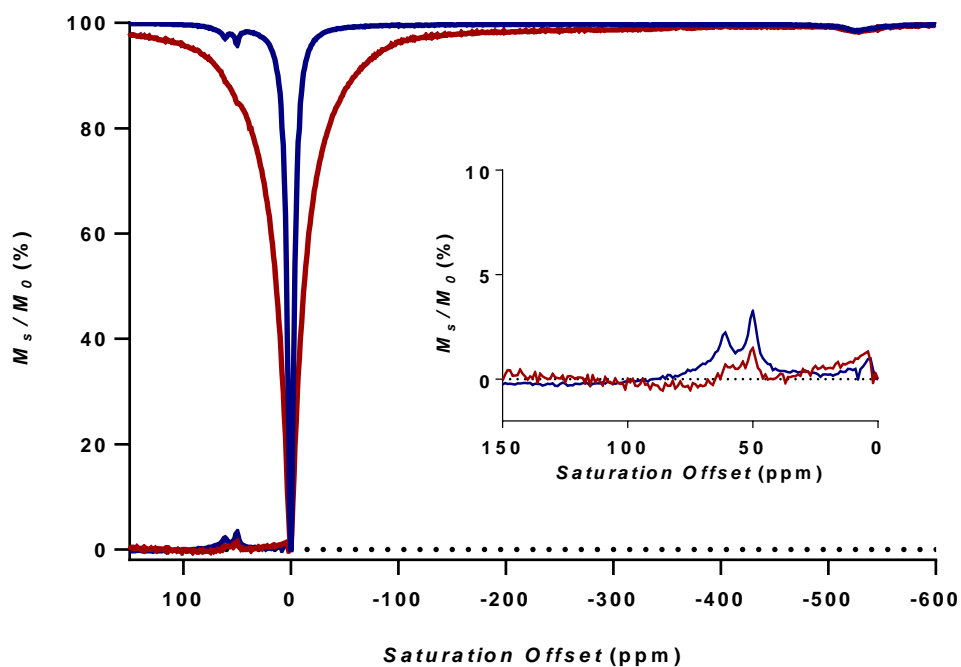

**Figure S2.** CEST spectra of 20mM Tb•2 agent recorded at 310K and pH 7.0 in  $CD_3CN/H_2O$  (1:1) with  $B_1$  of 11.7  $\mu T$ . Tb•2 agent only: blue line; Tb•2 agent mixed with minced kidney tissue of mice: red line. The inset enlarges the size of CEST asymmetry spectra.

## II. Measurement of the Bound Water Lifetime ( $\tau_B$ ) by $T_{2\text{exch}}$

For *in vitro* data collection, five different concentrations of Tb•2 were prepared (1, 3, 6, 8, and 12 mM) at pH 5.0 and (1.25, 2.5, 4, 5 and 8 mM) at pH 8.0, respectively. The total  $T_2$  ( $T_{2\text{tot}}$ ) of each sample was measured using a Maran Ultra 0.54 T spectrometer with three different temperatures controlled at 25, 37 and 52 °C. The Carr–Purcell–Meiboom–Gill sequence and a nonlinear least-squares fitting procedure were used to process the data. Linear fits were used to calculate the total transverse relaxivity ( $r_{2\text{tot}}$ ) for each temperature and the slope of each linear fit gives the value of  $r_{2\text{tot}}$  for the agent. All the samples were allowed to equilibrate in the probe for 15 minutes at each temperature before data acquisition.

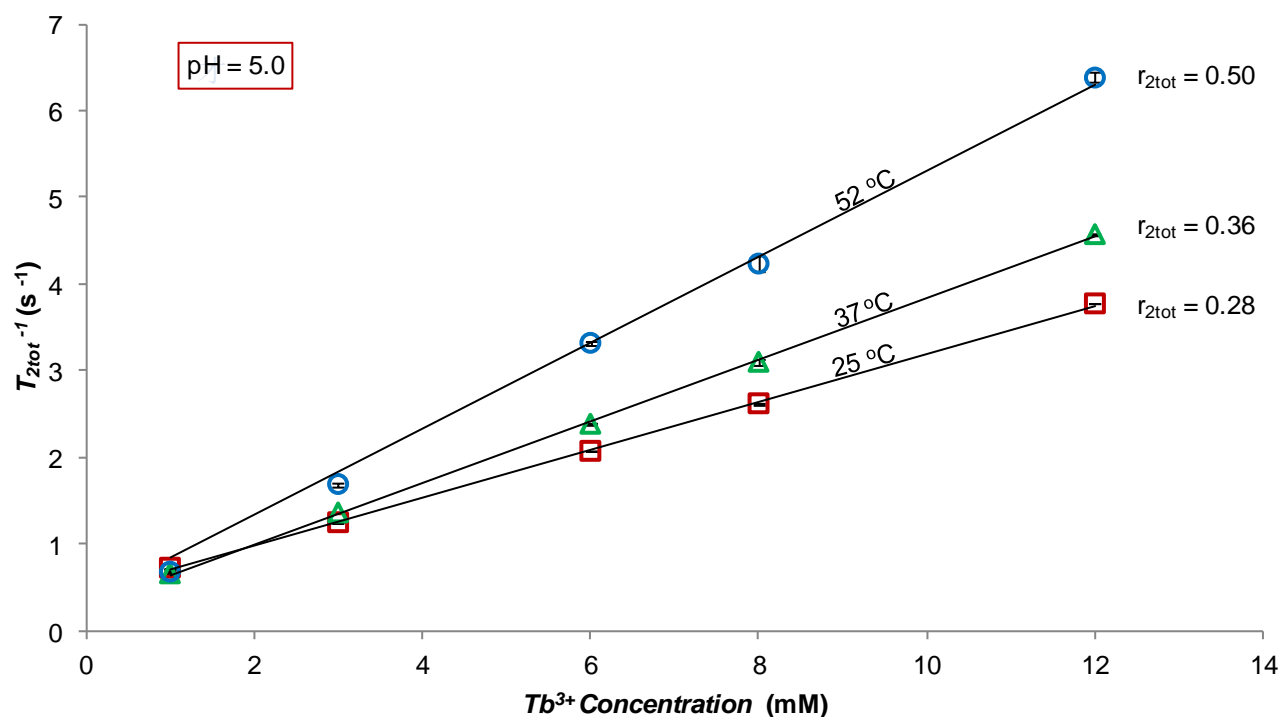

**Figure S3.** A plot of total transverse relaxation rate ( $T_{2\text{tot}}^{-1}$ ) versus  $\text{Tb}^{3+}$  concentration (mM) for Tb•2 at 0.54 T (23 MHz) and 25, 37 and 52 °C, respectively. The pH values of the samples are 5.0. The  $r_{2\text{tot}}$  values for each linear fit are given in  $\text{mM}^{-1} \text{s}^{-1}$  and directly proportional to temperature.

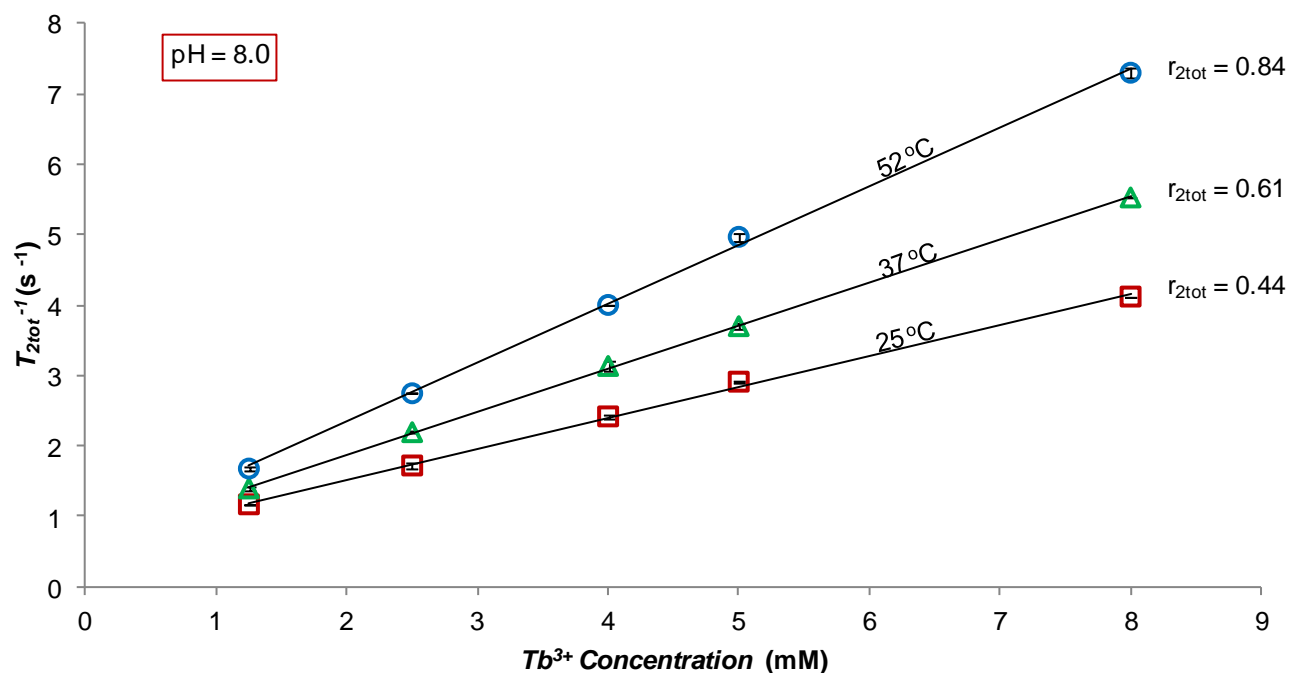

**Figure S4.** A plot of total transverse relaxation rate ( $T_{2\text{tot}}^{-1}$ ) versus  $\text{Tb}^{3+}$  concentration (mM) for  $\text{Tb}\bullet 2$  at 0.54 T (23 MHz) and 25, 37 and 52 °C, respectively. The pH values of the samples are 8.0. The  $r_{2\text{tot}}$  values for each linear fit are given in  $\text{mM}^{-1} \text{s}^{-1}$  and directly proportional to temperature.

The transverse relaxivity due to water molecule exchange ( $r_{2\text{exch}}$ ) was then calculated by subtracting the total transverse relaxivity of  $\text{TbTETA}$  from  $r_{2\text{tot}}$  ( $r_{2\text{exch}} = r_{2\text{tot}} - r_{2\text{TbTETA}}$ ). Note that for  $\text{TbTETA}$ , which has no water molecule exchange, its  $r_{2\text{tot}}$  is relatively independent of temperature. The measurement error in  $r_{2\text{tot}}$  from the least squares fitting was less than 10% and the  $\text{Tb}^{3+}$  concentration of each sample was determined by ICP-OES analysis.

**Table S1**

Measured  $r_{2\text{tot}}$ ,  $r_{2\text{exch}}$  and  $\tau_{\text{B}}$  values for  $\text{Tb}\bullet 2$  taken at 298 and 310K, respectively, where  $r_{2\text{exch}} = r_{2\text{tot}} - r_{2\text{TbTETA}}$ .

| $\text{Tb}^{3+}$ chelate | Total transverse relaxivity<br>$r_{2\text{tot}}$ ( $\text{mM}^{-1} \text{s}^{-1}$ ) |      |       |      | Exchange transverse relaxivity<br>$r_{2\text{exch}}$ ( $\text{mM}^{-1} \text{s}^{-1}$ ) |      |       |      | Bound water molecule lifetime<br>$\tau_{\text{B}}$ ( $\mu\text{s}$ ) |      |       |      |
|--------------------------|-------------------------------------------------------------------------------------|------|-------|------|-----------------------------------------------------------------------------------------|------|-------|------|----------------------------------------------------------------------|------|-------|------|
|                          | 25 °C                                                                               |      | 37 °C |      | 25 °C                                                                                   |      | 37 °C |      | 25 °C                                                                |      | 37 °C |      |
|                          | pH=5                                                                                | pH=8 | pH=5  | pH=8 | pH=5                                                                                    | pH=8 | pH=5  | pH=8 | pH=5                                                                 | pH=8 | pH=5  | pH=8 |
| $\text{Tb}\bullet 2$     | 0.28                                                                                | 0.44 | 0.36  | 0.61 | 0.16                                                                                    | 0.36 | 0.24  | 0.53 | 224                                                                  | 149  | 106   | 66   |
| $\text{TbTETA}$          | 0.12                                                                                | 0.08 | 0.12  | 0.08 |                                                                                         |      |       |      |                                                                      |      |       |      |

Swift-Connick theory<sup>[1]</sup> predicts that the transverse relaxivity due to water molecule exchange ( $r_{2\text{exch}}$ ) is a function of the bound water molecule lifetime ( $\tau_{\text{B}}$ ) as given by :

$$r_{2exch} = (3.6 \times 10^{-5}) \frac{\tau_B \Delta\omega^2}{1 + \tau_B^2 \Delta\omega^2} \quad [1]$$

where  $\Delta\omega$  is the paramagnetic frequency shift of the bound water molecule protons expressed in  $\text{rad s}^{-1}$ . The Plots of  $r_{2exch}$  versus  $\tau_B$ , hereafter called a “Swift–Connick” plot for  $\text{Tb}^{3+}$  at 0.54 T at pH 5.0 ( $\Delta\omega = -534$  ppm or  $7.72 \times 10^4 \text{ rad s}^{-1}$  at 25 °C and  $\Delta\omega = -494$  ppm or  $7.14 \times 10^4 \text{ rad s}^{-1}$  at 37 °C) are shown in Figures S5 and S6. Swift-Connick Plots of  $r_{2exch}$  versus  $\tau_B$  for  $\text{Tb}^{3+}$  at 0.54 T at pH 8.0 ( $\Delta\omega = -591$  ppm or  $8.54 \times 10^4 \text{ rad s}^{-1}$  at 25 °C and  $\Delta\omega = -550$  ppm or  $7.95 \times 10^4 \text{ rad s}^{-1}$  at 37 °C) are shown in Figures S7 and S8. Equation [1] predicts that for  $\text{Tb}^{3+}$  at pH 5.0 and 25 °C, the  $r_{2exch}$  reaches a peak value of  $1.38 \text{ mM}^{-1} \text{ s}^{-1}$  at a specific bound water lifetime  $\tau_B$  of 13 ns. Accordingly the “fast” side of the Swift-Connick curve is defined as  $\tau_B < 13$  ns, while the “slow” side is defined as  $\tau_B > 13$  ns. The fast and slow exchange at different pH and temperature is defined in similar manner.

The previously calculated exchange transverse relaxivities (summarized in Table S1) were used to determine the bound water lifetimes in Figures S5-S8).

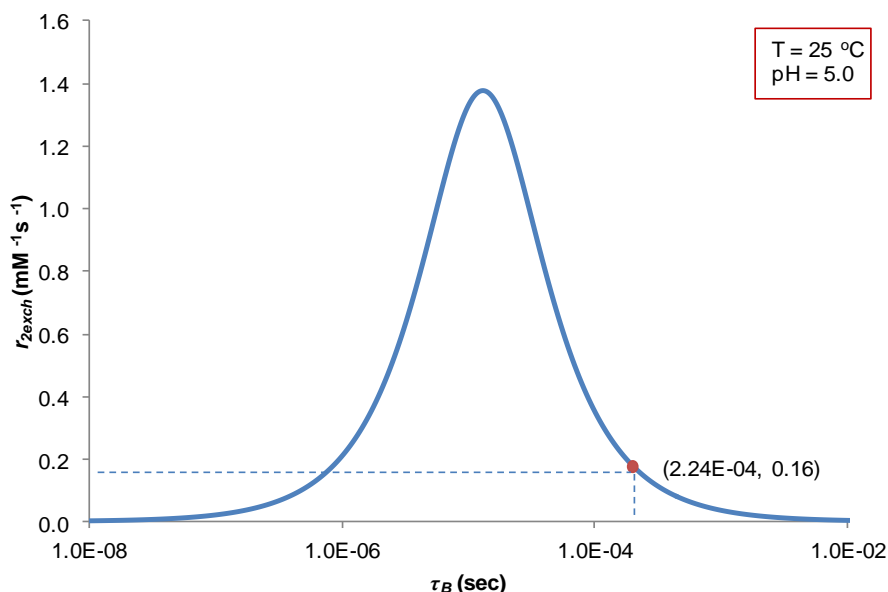

**Figure S5.** A Swift–Connick plot of transverse relaxivity  $r_{2exch}$  ( $\text{mM}^{-1} \text{s}^{-1}$ ) versus bound water lifetime  $\tau_B$  (s) for  $\text{Tb}^{3+}$  at 0.54 T and 25 °C. A  $\Delta\omega$  of -534 ppm was used to plot the curve.



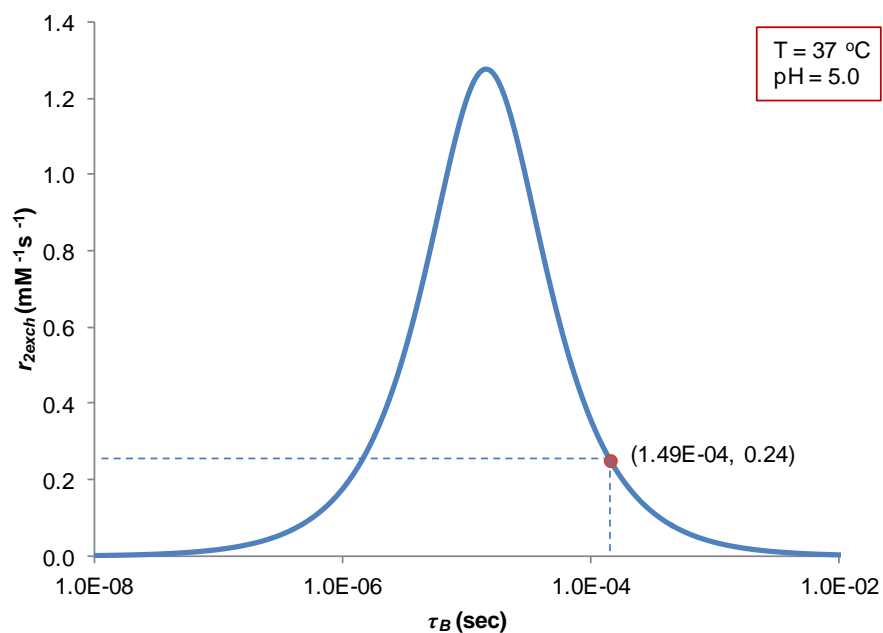

**Figure S6.** A Swift–Connick plot of transverse relaxivity  $r_{2\text{exch}}$  ( $\text{mM}^{-1} \text{s}^{-1}$ ) versus bound water lifetime  $\tau_B$  (s) for  $\text{Tb}^{3+}$  at 0.54 T and 37 °C. A  $\Delta\omega$  of -494 ppm was used to plot the curve.

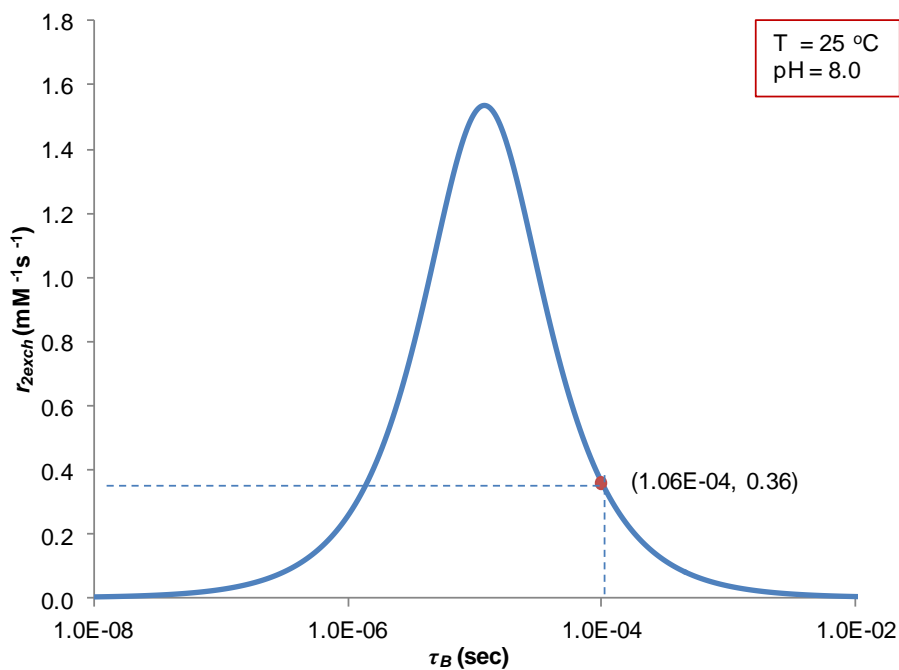

**Figure S7.** A Swift–Connick plot of transverse relaxivity  $r_{2\text{exch}}$  ( $\text{mM}^{-1} \text{s}^{-1}$ ) versus bound water lifetime  $\tau_B$  (s) for  $\text{Tb}^{3+}$  at 0.54 T and 25 °C. A  $\Delta\omega$  of -591 ppm was used to plot the curve.

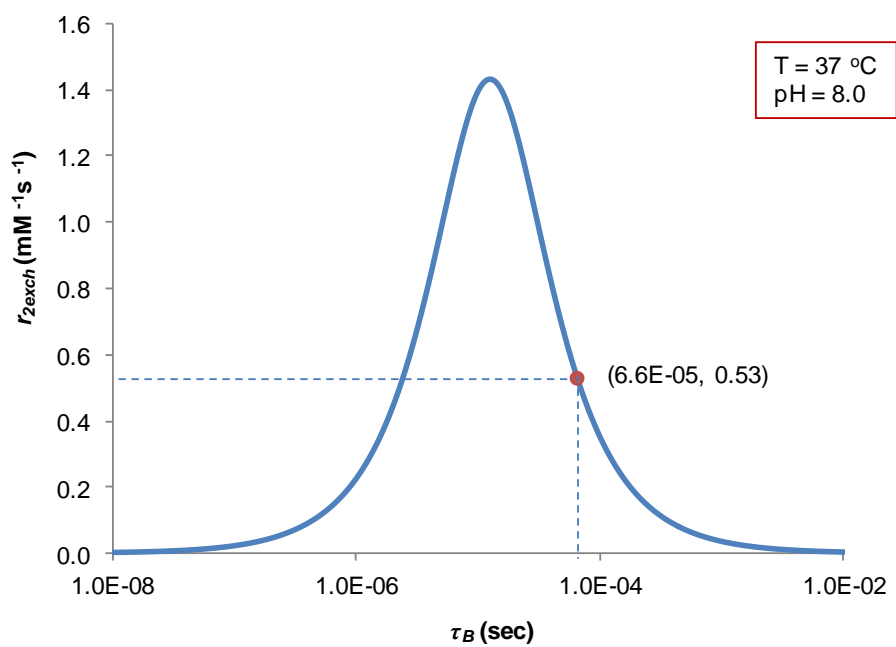

**Figure S8.** A Swift–Connick plot of transverse relaxivity  $r_{2exch}$  ( $mM^{-1} s^{-1}$ ) versus bound water lifetime  $\tau_B$  (s) for  $Tb^{3+}$  at 0.54 T and 37 °C. A  $\Delta\omega$  of -550 ppm was used to plot the curve.

### **III. Imaging Protocols**

A phantom of seven samples (20 mM) in bundled capillaries was used for phantom MR imaging. The sample pH values were maintained in the pH range from 5.5 to 8.2 using MES or HEPES buffers (5 mM). The sample temperature was regulated at  $37.0 \pm 0.1$  °C with an animal monitoring system from Small Animal Instruments (Stony Brook, NY). The phantom image were acquired with an Agilent 9.4 T (400 MHz) small animal MR imaging system equipped with a homemade surface nano-coil. The MRI data were acquired using a steady state gradient echo pulse sequence (GEMS) with centric K-space encoding preceded by a rectangular saturation pulse (power = 100  $\mu$ T and duration = 5 s). The pre-saturation frequency offset was varied from 100 to -800 ppm with a frequency offset step of 5 ppm. Other acquisition parameters are TR = 5.2 s, TE = 2.9 ms, average = 1, FOV = 4 mm  $\times$  4 mm, matrix = 32  $\times$  32, and flip angle = 30°.

### **IV. Imaging Processing**

The CEST images were processed using self-written scripts in MATLAB R2009a (The Mathworks, Inc., Natick, MA, USA). The image data were analyzed at a voxel-by-voxel level. Groups of 3  $\times$  3 adjacent voxels were binned to improve the signal-to-noise ratio of the center voxel. The Z spectra arising from the image voxels were fitted to Lorentzian line shapes. The noise filter (CEST effect < 1%) was applied to remove the CEST signals arising from the noisy data. Finally, according to the pH calibration curve (Figure 1 inset), the pH maps were converted from the CEST peak frequency maps obtained from the fitted Z spectra.

## V. Experimental

### General Remarks

All reagents and solvents were purchased from commercial sources and used as received unless otherwise stated.  $^1\text{H}$  and  $^{13}\text{C}$  NMR and CEST spectra were recorded on a Varian INOVA 400 spectrometer. The chemical shift values were reported relative to TMS and given in ppm ( $\delta$ -scale). CEST images were recorded on an Agilent 9.4 T small animal imaging system. The pH values of the samples were measured at ambient temperature using a Corning 125 pH meter with a calibrated combined microelectrode purchased from Aldrich Chemical Co. The NMR sample was allowed to equilibrate in the probe for 10 minutes at each temperature before data acquisition. "Water" refers to high purity water with a resistance of  $>18\text{ M}\Omega$ . ICP analyses were done by the Galbraith Laboratories, Inc (Knoxville, TN). ESI LC-MS spectra were recorded with a Waters QtofMS-XEVO instrument.

### Synthesis of Ligand 2

The ligand was synthesized according to Scheme S1. Mono-Cbz protected cyclen **7**, bromo-methyl-acetamide-methylene phosphonate **8** and bromo-methyl-phenol **5** were synthesized according to literature procedures.<sup>[2]</sup>

**Scheme S1.** Synthesis of Ligand 2

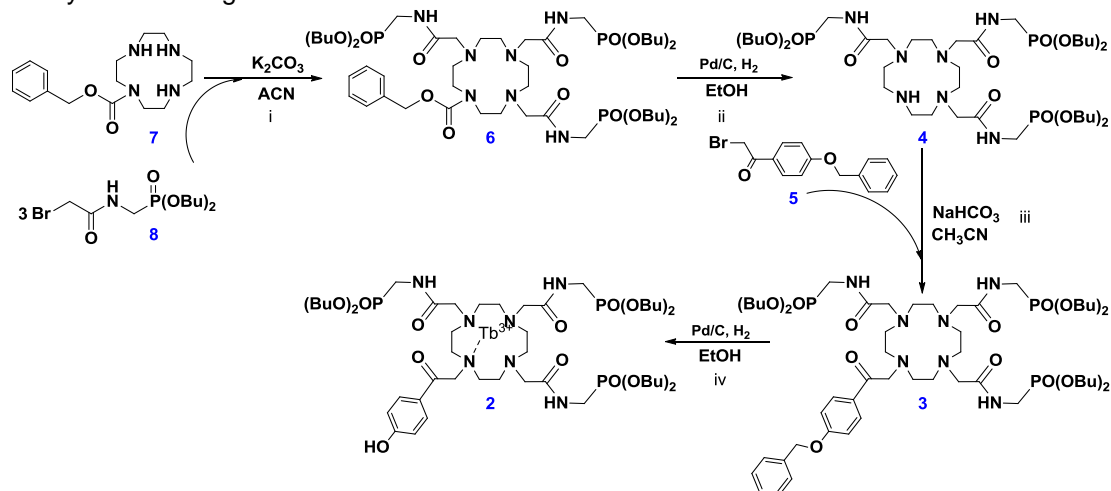

**1-Benzyloxycarbonyl-4,7,10-tris-(aminomethylphosphonic acid dibutyl ester) amide-1,4,7,10-tetraazacyclododecane (6).** A mixture of mono-Cbz protected cyclen **7** (3.91 g, 12.76 mmol), dibutyl (2-bromoacetamido)methylphosphonate **8** (13.63 g, 39.60 mmol) and potassium carbonate (5.53 g, 39.60 mmol) in acetonitrile was heated at 55 °C for 3 days. The mixture of solution was cooled down to room temperature and poured through a filter paper in a Buchner funnel. The filtrate was evaporated under vacuum and purified by column chromatography on silica gel, eluting with 5:95 methanol-chloroform to yield 12.30 g (11.22 mmol, 88%) of sticky yellow oil. <sup>1</sup>H NMR (400 MHz, CDCl<sub>3</sub>) δ 7.66 (s, 2H, Ph), 7.23 (m, 3H, Ph), 5.00 (s, 2H, PhCH<sub>2</sub>O), 3.94 (q, 12H, POCH<sub>2</sub>CH<sub>2</sub>CH<sub>2</sub>CH<sub>3</sub>), 3.62 (dd, 4H, NHCH<sub>2</sub>PO), 3.43 (dd, 2H, NHCH<sub>2</sub>PO), 3.13 (s, 4H, N<sub>ring</sub>CH<sub>2</sub>CO), 3.07 (s, 2H, N<sub>ring</sub>CH<sub>2</sub>CO), 2.93 (b, 16H, N<sub>ring</sub>CH<sub>2</sub>), 1.53 (m, 12H, POCH<sub>2</sub>CH<sub>2</sub>CH<sub>2</sub>CH<sub>3</sub>), 1.28 (m, 12H, POCH<sub>2</sub>CH<sub>2</sub>CH<sub>2</sub>CH<sub>3</sub>), 0.82 (t, 18H, <sup>3</sup>J<sub>H-H</sub> = 7 Hz, POCH<sub>2</sub>CH<sub>2</sub>CH<sub>2</sub>CH<sub>3</sub>); <sup>13</sup>C NMR (100MHz, CDCl<sub>3</sub>) δ 170.8 (N<sub>ring</sub>CH<sub>2</sub>C=O), 170.7 (N<sub>ring</sub>CH<sub>2</sub>C=O), 156.2(N<sub>ring</sub>C=O), 136.6 (1-Ph), 128.5 (2-Ph), 128.0 (4-Ph), 127.8 (3-Ph), 67.1(PhCH<sub>2</sub>O), 66.1(POCH<sub>2</sub>CH<sub>2</sub>CH<sub>2</sub>CH<sub>3</sub>), 66.0 (N<sub>ring</sub>CH<sub>2</sub>CO), 54.5 (N<sub>ring</sub>CH<sub>2</sub>), 54.0 (N<sub>ring</sub>CH<sub>2</sub>), 53.3 (N<sub>ring</sub>CH<sub>2</sub>), 52.0 (N<sub>ring</sub>CH<sub>2</sub>), 34.2 (d, NCH<sub>2</sub>P, J<sub>CP</sub> = 157 Hz), 32.4 (POCH<sub>2</sub>CH<sub>2</sub>CH<sub>2</sub>CH<sub>3</sub>), 18.6 (POCH<sub>2</sub>CH<sub>2</sub>CH<sub>2</sub>CH<sub>3</sub>), 13.5 (POCH<sub>2</sub>CH<sub>2</sub>CH<sub>2</sub>CH<sub>3</sub>). *m/z* (ESMS ESI<sup>+</sup>): 1096 [M+H]<sup>+</sup>, an appropriate isotope pattern was observed.

**1,4,7-tris-(aminomethylphosphonic acid dibutyl ester) amide-1,4,7,10-tetraazacyclododecane (4).** Compound **6** (8.19 g, 7.47 mmol) was dissolved in ethanol (50 mL). 10% palladium on carbon (0.8 g) was then added. The reaction mixture was shaken on a Parr hydrogenator under a H<sub>2</sub> pressure of 50 psi at room temperature for 18 hours. The mixture was filtered and the solvent was removed under reduced pressure to afford 6.91 g (7.18 mmol, 96%) of pale yellow oil. <sup>1</sup>H NMR (400 MHz, CDCl<sub>3</sub>) δ 4.00 (q, 12H, POCH<sub>2</sub>CH<sub>2</sub>CH<sub>2</sub>CH<sub>3</sub>), 3.65 (dd, 4H, NHCH<sub>2</sub>PO), 3.45 (dd, 2H, NHCH<sub>2</sub>PO), 3.25 (s, 4H, N<sub>ring</sub>CH<sub>2</sub>CO), 2.97 (s, 2H, N<sub>ring</sub>CH<sub>2</sub>CO), 2.64 (b, 16H, N<sub>ring</sub>CH<sub>2</sub>), 1.57 (m, 12H, POCH<sub>2</sub>CH<sub>2</sub>CH<sub>2</sub>CH<sub>3</sub>), 1.32 (m, 12H, POCH<sub>2</sub>CH<sub>2</sub>CH<sub>2</sub>CH<sub>3</sub>), 0.86 (t, 18H, <sup>3</sup>J<sub>H-H</sub> = 7 Hz, POCH<sub>2</sub>CH<sub>2</sub>CH<sub>2</sub>CH<sub>3</sub>); <sup>13</sup>C NMR (100MHz, CDCl<sub>3</sub>) δ 171.8 (N<sub>ring</sub>CH<sub>2</sub>C=O), 171.6 (N<sub>ring</sub>CH<sub>2</sub>C=O), 68.3(POCH<sub>2</sub>CH<sub>2</sub>CH<sub>2</sub>CH<sub>3</sub>), 68.2 (N<sub>ring</sub>CH<sub>2</sub>CO), 56.8 (N<sub>ring</sub>CH<sub>2</sub>), 56.4(N<sub>ring</sub>CH<sub>2</sub>), 54.3(N<sub>ring</sub>CH<sub>2</sub>), 52.6 (N<sub>ring</sub>CH<sub>2</sub>), 35.5 (d, NCH<sub>2</sub>P, J<sub>CP</sub> = 157 Hz), 33.1 (POCH<sub>2</sub>CH<sub>2</sub>CH<sub>2</sub>CH<sub>3</sub>), 19.1 (POCH<sub>2</sub>CH<sub>2</sub>CH<sub>2</sub>CH<sub>3</sub>), 13.9 (POCH<sub>2</sub>CH<sub>2</sub>CH<sub>2</sub>CH<sub>3</sub>). *m/z* (ESMS ESI<sup>+</sup>): 962 [M+H]<sup>+</sup>, an appropriate isotope pattern was observed.

**1-[2-(4-hydroxyphenyl)-2-oxoethyl]-4,7,10-tris-(aminomethylphosphonic acid dibutyl ester) amide-1,4,7,10-tetraazacyclododecane (3).** Compound **4** (6.56 g, 6.81 mmol), 2-bromo-1-[4-(phenylmethoxy)phenyl]-ethanone **5** (2.34 g, 7.50 mmol), and NaHCO<sub>3</sub> (0.64 g, 7.50 mmol) were added into acetonitrile (200 mL). The reaction mixture was heated at 65 °C under N<sub>2</sub> for 24 hours with stirring. The mixture was cooled to room temperature and filtered. The filtrate was evaporated to give

crude product. Then it was purified by column chromatography on silica gel, eluting with 20:80 methanol-chloroform to afford 6.88 g (5.80 mmol, 85%) of red brown oil.  $^1\text{H}$  NMR (400 MHz,  $\text{CDCl}_3$ )  $\delta$  7.84 (2H, d,  $^3J_{\text{H-H}} = 8$  Hz, Ph), 7.24-7.17 (5H, m, Ph), 6.81 (2H, d,  $^3J_{\text{H-H}} = 8$  Hz, Ph), 5.24 (s, 2H,  $\text{PhCH}_2$ ), 3.91 (m, 12H,  $\text{POCH}_2\text{CH}_2\text{CH}_2\text{CH}_3$ ), 3.68 (dd, 2H,  $\text{NHCH}_2\text{P}$ ), 3.56 (dd, 4H,  $\text{NHCH}_2\text{P}$ ), 3.24 (s, 2H,  $\text{N}_{\text{ring}}\text{CH}_2\text{CON}$ ), 3.21 (s, 6H,  $\text{N}_{\text{ring}}\text{CH}_2\text{CON}$ ), 2.83-1.99 (b, 16H,  $\text{N}_{\text{ring}}\text{CH}_2$ ), 1.46 (m, 12H,  $\text{POCH}_2\text{CH}_2\text{CH}_2\text{CH}_3$ ), 1.22 (m, 12H,  $^3J_{\text{H-H}} = 7$  Hz,  $\text{POCH}_2\text{CH}_2\text{CH}_2\text{CH}_3$ ), 0.76 (m, 18H,  $\text{POCH}_2\text{CH}_2\text{CH}_2\text{CH}_3$ );  $^{13}\text{C}$  NMR (100MHz,  $\text{CDCl}_3$ )  $\delta$  196.6 (C=O), 172.8 (C=O), 162.9 (Ph), 135.6 (Ph), 129.9 (Ph), 129.7 (Ph), 128.2 (Ph), 127.9 (Ph), 127.0 (Ph), 114.6 (Ph), 69.8 ( $\text{PhCH}_2$ ), 65.9 ( $\text{POCH}_2\text{CH}_2\text{CH}_2\text{CH}_3$ ), 61.4 ( $\text{N}_{\text{ring}}\text{CH}_2\text{CON}$ ), 59.2 ( $\text{N}_{\text{ring}}\text{CH}_2\text{CON}$ ), 50.5 (b,  $\text{N}_{\text{ring}}\text{CH}_2$ ), 34.3 (d,  $\text{NCH}_2\text{P}$ ,  $J_{\text{CP}} = 157$  Hz), 32.2 ( $\text{POCH}_2\text{CH}_2\text{CH}_2\text{CH}_3$ ), 18.3 ( $\text{POCH}_2\text{CH}_2\text{CH}_2\text{CH}_3$ ), 13.3 ( $\text{POCH}_2\text{CH}_2\text{CH}_2\text{CH}_3$ ).  $m/z$  (ESMS ESI+): 1186  $[\text{M}+\text{H}]^+$ , an appropriate isotope pattern was observed.

**1-N-[2-[4-hydroxyphenyl]-2-oxoethyl]-4,7,10-tris-(aminomethylphosphonic acid dibutyl ester) amide-1,4,7,10-tetraazacyclododecane (2).** Compound 3 (5.96 g, 5 mmol) was dissolved in ethanol (50 mL). 10% palladium on carbon (0.5 g) was then added. The reaction mixture was shaken on a Parr hydrogenator under a  $\text{H}_2$  pressure of 50 psi at room temperature for 2 days. The mixture was filtered and the solvent was removed under reduced pressure to afford 5.21 g (4.75 mmol, 95%) of a hygroscopic solid. Melting point and combustion analysis could not be determined due to its hygroscopic nature.  $^1\text{H}$  NMR (400 MHz,  $\text{CDCl}_3$ )  $\delta$  7.88 (d, 2H,  $^3J_{\text{H-H}} = 8$  Hz, Ph), 6.88 (d, 2H,  $^3J_{\text{H-H}} = 8$  Hz, Ph), 3.92 (q, 12H,  $\text{POCH}_2\text{CH}_2\text{CH}_2\text{CH}_3$ ), 3.52 (dd, 6H,  $\text{NHCH}_2\text{P}$ ), 3.22 (b, 8H,  $\text{N}_{\text{ring}}\text{CH}_2\text{CON}$ ), 2.88-2.08 (b, 16H,  $\text{N}_{\text{ring}}\text{CH}_2$ ), 1.50 (m, 12H,  $\text{POCH}_2\text{CH}_2\text{CH}_2\text{CH}_3$ ), 1.25 (m, 12H,  $\text{POCH}_2\text{CH}_2\text{CH}_2\text{CH}_3$ ), 0.79 (m, 18H,  $\text{POCH}_2\text{CH}_2\text{CH}_2\text{CH}_3$ );  $^{13}\text{C}$  NMR (100MHz,  $\text{CDCl}_3$ )  $\delta$  195.3 (C=O), 171.2 (C=O), 162.4 (Ph), 135.4 (Ph), 127.8 (Ph), 114.0 (Ph), 65.8 ( $\text{POCH}_2\text{CH}_2\text{CH}_2\text{CH}_3$ ), 59.9 ( $\text{N}_{\text{ring}}\text{CH}_2\text{CON}$ ), 56.4 ( $\text{N}_{\text{ring}}\text{CH}_2\text{CON}$ ), 55.1 (b,  $\text{N}_{\text{ring}}\text{CH}_2$ ), 40.6 ( $\text{NHCH}_2\text{PO}$ ), 40.5 ( $\text{NHCH}_2\text{PO}$ ), 34.2 (d,  $\text{NCH}_2\text{P}$ ,  $J_{\text{CP}} = 157$  Hz), 32.4 ( $\text{POCH}_2\text{CH}_2\text{CH}_2\text{CH}_3$ ), 18.6 ( $\text{POCH}_2\text{CH}_2\text{CH}_2\text{CH}_3$ ), 13.5 ( $\text{POCH}_2\text{CH}_2\text{CH}_2\text{CH}_3$ ).  $m/z$  (ESMS ESI+): 1096  $[\text{M}+\text{H}]^+$ , an appropriate isotope pattern was observed.

## Synthesis of the Metal Complex

**Terbium (III) 1-N-[2-[4-hydroxyphenyl]-2-oxoethyl]-4,7,10-tris-(aminomethylphosphonic acid dibutyl ester) amide-1,4,7,10-tetraazacyclododecane (Tb•2).** To a solution of the ligand 2 (0.305 g, 0.28 mmol) in acetonitrile (40 mL) was added a solution of the terbium triflate (0.166 g, 0.27 mmol) in acetonitrile (10 mL). The reaction was heated to 70 °C and stirred for 18 hours. The absence of any free  $\text{Tb}^{3+}$  metal was confirmed using the Xylenol Orange indicator test. The solvent was removed under

reduced pressure, and the residue was dried under high vacuum for 3 hours to afford the complex. The concentration of Tb<sup>3+</sup> in this complex was measured using ICP-OES analysis.

## VI. References

[1] T. J. Swift, R. E. Connick, *J. Chem. Phys.* **1962**, *37*, 307-320.

[2] a) Y. Wu, T. C. Soesbe, G. E. Kiefer, P. Zhao, A. D. Sherry, *J. Am. Chem. Soc.* **2010**, *132*, 14002-14003; b) F. A. Rojas-Quijano, E. T. Benyo, G. Tircso, F. K. Kalman, Z. Baranyai, S. Aime, A. D. Sherry, Z. Kovacs, *Chemistry* **2009**, *15*, 13188-13200.
